# Supplementary material for: Variable Selection for Generalized Linear Models with Interval-Censored Failure Time Data
Source: MDPI journal article supplement (doi:10.3390/math10050763), 2022-02-27
Supplement: s1 [file s1]

## Supplemental Material

Tables S1 - S4 displays the results obtained in the same way as with Table 1 except that we only considered  $\beta_0 = (0.5, 0.5, \dots, 0)^\top$  and  $\beta_0 = (0.5, 0.7, 0, \dots, 0)^\top$  and the bandwidth selection methods (a), (b), (c) and (d) were used, respectively. It is apparent that they gave similar conclusions as above and again indicate that the proposed variable selection approach seems to work well. Furthermore, they suggest that the joint selection of the tuning parameter  $\lambda_n$  and the bandwidth can be expected to yield larger TP and smaller FP and MMSE.

**Table S1.** Simulation results based on the bandwidth selection method (a).

| $p$                               | Method | $n = 300$                         |       |              | $n = 500$ |       |              |
|-----------------------------------|--------|-----------------------------------|-------|--------------|-----------|-------|--------------|
|                                   |        | $\beta = (0.5, 0.5, 0, \dots, 0)$ |       |              |           |       |              |
|                                   |        | TP                                | FP    | MMSE(SD)     | TP        | FP    | MMSE(SD)     |
| 10                                | LASSO  | 1.96                              | 1.56  | 0.180(0.073) | 2.00      | 1.65  | 0.152(0.060) |
|                                   | SCAD   | 1.87                              | 1.35  | 0.164(0.097) | 1.98      | 1.39  | 0.131(0.068) |
|                                   | MCP    | 1.85                              | 1.23  | 0.165(0.100) | 1.97      | 1.21  | 0.127(0.069) |
|                                   | BAR    | 1.70                              | 0.57  | 0.174(0.092) | 1.86      | 0.43  | 0.138(0.071) |
| 30                                | LASSO  | 1.91                              | 4.76  | 0.257(0.128) | 1.99      | 4.26  | 0.218(0.307) |
|                                   | SCAD   | 1.82                              | 4.31  | 0.280(0.237) | 1.98      | 3.92  | 0.131(0.068) |
|                                   | MCP    | 1.80                              | 4.11  | 0.347(0.306) | 1.97      | 3.44  | 0.127(0.069) |
|                                   | BAR    | 1.68                              | 1.52  | 0.245(0.155) | 1.86      | 1.29  | 0.138(0.071) |
| 50                                | LASSO  | 1.96                              | 7.85  | 0.267(0.114) | 1.97      | 6.41  | 0.232(0.100) |
|                                   | SCAD   | 1.83                              | 7.21  | 0.309(0.214) | 1.93      | 6.72  | 0.249(0.239) |
|                                   | MCP    | 1.81                              | 6.98  | 0.437(0.324) | 1.90      | 6.10  | 0.314(0.321) |
|                                   | BAR    | 1.66                              | 2.05  | 0.266(0.151) | 1.82      | 2.28  | 0.231(0.161) |
| 100                               | LASSO  | 1.89                              | 16.22 | 0.505(0.992) | 1.97      | 13.60 | 0.330(0.160) |
|                                   | SCAD   | 1.72                              | 15.61 | 0.876(2.562) | 1.88      | 13.36 | 0.309(0.292) |
|                                   | MCP    | 1.64                              | 14.66 | 1.341(2.733) | 1.85      | 12.05 | 0.455(0.455) |
|                                   | BAR    | 1.51                              | 4.98  | 0.641(1.569) | 1.76      | 4.17  | 0.293(0.178) |
| $\beta = (0.5, 0.7, 0, \dots, 0)$ |        |                                   |       |              |           |       |              |
| 10                                | LASSO  | 1.96                              | 1.21  | 0.172(0.068) | 1.99      | 1.63  | 0.237(0.104) |
|                                   | SCAD   | 1.95                              | 1.33  | 0.234(0.121) | 1.96      | 1.26  | 0.210(0.179) |
|                                   | MCP    | 1.95                              | 1.26  | 0.230(0.120) | 1.96      | 1.08  | 0.208(0.185) |
|                                   | BAR    | 1.87                              | 0.54  | 0.244(0.106) | 1.95      | 0.46  | 0.207(0.115) |
| 30                                | LASSO  | 1.96                              | 3.87  | 0.306(0.104) | 2.00      | 4.27  | 0.305(0.300) |
|                                   | SCAD   | 1.84                              | 4.48  | 0.350(0.268) | 1.98      | 3.80  | 0.301(0.614) |
|                                   | MCP    | 1.84                              | 4.33  | 0.419(0.344) | 1.97      | 3.33  | 0.324(0.653) |
|                                   | BAR    | 1.72                              | 1.58  | 0.321(0.191) | 1.94      | 1.29  | 0.276(0.465) |
| 50                                | LASSO  | 1.98                              | 7.80  | 0.444(0.641) | 2.00      | 7.54  | 0.335(0.183) |
|                                   | SCAD   | 1.92                              | 7.21  | 0.572(1.479) | 1.96      | 6.72  | 0.350(0.528) |
|                                   | MCP    | 1.90                              | 6.90  | 0.692(1.551) | 1.97      | 6.24  | 0.430(0.650) |
|                                   | BAR    | 1.79                              | 2.44  | 0.487(1.064) | 1.87      | 2.19  | 0.312(0.284) |
| 100                               | LASSO  | 1.95                              | 16.36 | 0.617(0.972) | 1.99      | 14.02 | 0.349(0.124) |
|                                   | SCAD   | 1.83                              | 15.49 | 0.982(2.344) | 1.93      | 13.29 | 0.366(0.257) |
|                                   | MCP    | 1.78                              | 14.72 | 1.504(2.800) | 1.93      | 11.69 | 0.499(0.447) |
|                                   | BAR    | 1.62                              | 4.73  | 0.710(1.480) | 1.88      | 3.88  | 0.338(0.172) |

**Table S2.** Simulation results based on the bandwidth selection method (b).

| $p$                               | Method | $n = 300$                         |       |              | $n = 500$ |       |              |
|-----------------------------------|--------|-----------------------------------|-------|--------------|-----------|-------|--------------|
|                                   |        | $\beta = (0.5, 0.5, 0, \dots, 0)$ |       |              |           |       |              |
|                                   |        | TP                                | FP    | MMSE(SD)     | TP        | FP    | MMSE(SD)     |
| 10                                | LASSO  | 1.96                              | 1.21  | 0.172(0.068) | 1.99      | 1.35  | 0.159(0.058) |
|                                   | SCAD   | 1.89                              | 1.12  | 0.146(0.074) | 1.96      | 1.18  | 0.132(0.070) |
|                                   | MCP    | 1.89                              | 1.02  | 0.141(0.074) | 1.95      | 0.98  | 0.128(0.073) |
|                                   | BAR    | 1.80                              | 0.42  | 0.152(0.073) | 1.86      | 0.27  | 0.138(0.067) |
| 30                                | LASSO  | 1.96                              | 3.80  | 0.215(0.081) | 1.98      | 3.67  | 0.186(0.074) |
|                                   | SCAD   | 1.88                              | 3.37  | 0.198(0.107) | 1.97      | 3.37  | 0.156(0.093) |
|                                   | MCP    | 1.85                              | 3.20  | 0.227(0.140) | 1.94      | 2.94  | 0.167(0.121) |
|                                   | BAR    | 1.74                              | 1.14  | 0.192(0.105) | 1.89      | 1.03  | 0.115(0.091) |
| 50                                | LASSO  | 1.97                              | 6.41  | 0.232(0.100) | 2.00      | 6.44  | 0.224(0.088) |
|                                   | SCAD   | 1.88                              | 6.15  | 0.237(0.184) | 1.90      | 5.96  | 0.258(0.131) |
|                                   | MCP    | 1.86                              | 5.57  | 0.307(0.301) | 1.89      | 5.18  | 0.244(0.196) |
|                                   | BAR    | 1.74                              | 1.63  | 0.214(0.132) | 1.85      | 1.64  | 0.192(0.121) |
| 100                               | LASSO  | 1.97                              | 13.60 | 0.330(0.160) | 1.98      | 11.63 | 0.241(0.118) |
|                                   | SCAD   | 1.84                              | 12.87 | 0.415(0.366) | 1.90      | 10.88 | 0.219(0.137) |
|                                   | MCP    | 1.77                              | 12.09 | 0.690(0.628) | 1.88      | 9.60  | 0.295(0.227) |
|                                   | BAR    | 1.61                              | 3.67  | 0.357(0.232) | 1.84      | 3.04  | 0.230(0.155) |
| $\beta = (0.5, 0.7, 0, \dots, 0)$ |        |                                   |       |              |           |       |              |
| 10                                | LASSO  | 1.97                              | 1.22  | 0.263(0.083) | 1.99      | 1.32  | 0.240(0.069) |
|                                   | SCAD   | 1.95                              | 1.10  | 0.212(0.090) | 1.97      | 1.08  | 0.195(0.076) |
|                                   | MCP    | 1.94                              | 1.08  | 0.211(0.089) | 1.96      | 0.93  | 0.197(0.088) |
|                                   | BAR    | 1.88                              | 0.36  | 0.228(0.093) | 1.94      | 0.35  | 0.206(0.079) |
| 30                                | LASSO  | 1.96                              | 3.87  | 0.306(0.104) | 2.00      | 3.65  | 0.271(0.087) |
|                                   | SCAD   | 1.89                              | 3.45  | 0.260(0.123) | 1.99      | 3.43  | 0.221(0.100) |
|                                   | MCP    | 1.89                              | 3.21  | 0.284(0.149) | 1.98      | 2.94  | 0.233(0.118) |
|                                   | BAR    | 1.82                              | 1.19  | 0.258(0.113) | 1.95      | 1.07  | 0.224(0.095) |
| 50                                | LASSO  | 1.98                              | 6.27  | 0.321(0.107) | 2.00      | 6.23  | 0.307(0.090) |
|                                   | SCAD   | 1.96                              | 5.66  | 0.286(0.189) | 1.99      | 5.80  | 0.262(0.125) |
|                                   | MCP    | 1.95                              | 5.74  | 0.356(0.279) | 1.98      | 5.19  | 0.306(0.173) |
|                                   | BAR    | 1.87                              | 1.74  | 0.274(0.128) | 1.88      | 1.78  | 0.265(0.122) |
| 100                               | LASSO  | 1.98                              | 13.25 | 0.411(0.166) | 1.98      | 11.67 | 0.330(0.127) |
|                                   | SCAD   | 1.84                              | 12.53 | 0.462(0.405) | 1.93      | 11.19 | 0.285(0.166) |
|                                   | MCP    | 1.81                              | 11.78 | 0.724(0.690) | 1.93      | 10.09 | 0.378(0.265) |
|                                   | BAR    | 1.71                              | 3.35  | 0.403(0.236) | 1.88      | 3.12  | 0.298(0.179) |

**Table S3.** Simulation results based on the bandwidth selection method (c).

| $p$                               | Method | $n = 300$                         |       |              | $n = 500$ |       |              |
|-----------------------------------|--------|-----------------------------------|-------|--------------|-----------|-------|--------------|
|                                   |        | $\beta = (0.5, 0.5, 0, \dots, 0)$ |       |              |           |       |              |
|                                   |        | TP                                | FP    | MMSE(SD)     | TP        | FP    | MMSE(SD)     |
| 10                                | LASSO  | 1.95                              | 1.32  | 0.176(0.072) | 2.00      | 1.48  | 0.159(0.061) |
|                                   | SCAD   | 1.89                              | 1.16  | 0.149(0.077) | 1.94      | 1.20  | 0.135(0.068) |
|                                   | MCP    | 1.89                              | 1.08  | 0.146(0.078) | 1.93      | 1.08  | 0.132(0.074) |
|                                   | BAR    | 1.77                              | 0.40  | 0.158(0.079) | 1.91      | 0.63  | 0.133(0.063) |
| 30                                | LASSO  | 1.95                              | 4.05  | 0.225(0.089) | 1.98      | 3.78  | 0.188(0.075) |
|                                   | SCAD   | 1.82                              | 3.62  | 0.215(0.129) | 1.97      | 3.47  | 0.158(0.096) |
|                                   | MCP    | 1.81                              | 3.38  | 0.248(0.156) | 1.96      | 3.37  | 0.286(1.148) |
|                                   | BAR    | 1.70                              | 1.26  | 0.205(0.114) | 1.89      | 1.48  | 0.164(0.096) |
| 50                                | LASSO  | 1.96                              | 6.67  | 0.243(0.110) | 2.00      | 6.71  | 0.223(0.075) |
|                                   | SCAD   | 1.88                              | 6.46  | 0.256(0.201) | 1.89      | 6.39  | 0.206(0.114) |
|                                   | MCP    | 1.85                              | 6.04  | 0.341(0.316) | 1.89      | 5.49  | 0.252(0.174) |
|                                   | BAR    | 1.71                              | 1.82  | 0.232(0.151) | 1.84      | 1.89  | 0.201(0.116) |
| 100                               | LASSO  | 1.96                              | 14.20 | 0.354(0.201) | 1.96      | 12.46 | 0.252(0.127) |
|                                   | SCAD   | 1.80                              | 13.53 | 0.478(0.428) | 1.88      | 11.64 | 0.242(0.167) |
|                                   | MCP    | 1.75                              | 12.95 | 0.801(0.739) | 1.86      | 10.49 | 0.354(0.463) |
|                                   | BAR    | 1.58                              | 3.92  | 0.394(0.276) | 1.81      | 4.67  | 0.279(0.186) |
| $\beta = (0.5, 0.7, 0, \dots, 0)$ |        |                                   |       |              |           |       |              |
| 10                                | LASSO  | 1.97                              | 1.34  | 0.266(0.086) | 1.99      | 1.32  | 0.240(0.069) |
|                                   | SCAD   | 1.94                              | 1.13  | 0.218(0.098) | 1.97      | 1.08  | 0.195(0.076) |
|                                   | MCP    | 1.94                              | 1.13  | 0.214(0.094) | 1.96      | 0.93  | 0.197(0.088) |
|                                   | BAR    | 1.87                              | 0.41  | 0.234(0.099) | 1.94      | 0.35  | 0.206(0.079) |
| 30                                | LASSO  | 1.95                              | 4.05  | 0.306(0.104) | 2.00      | 3.65  | 0.271(0.087) |
|                                   | SCAD   | 1.88                              | 3.58  | 0.278(0.145) | 1.99      | 3.43  | 0.221(0.100) |
|                                   | MCP    | 1.87                              | 3.37  | 0.305(0.169) | 1.98      | 2.94  | 0.233(0.118) |
|                                   | BAR    | 1.82                              | 1.16  | 0.265(0.120) | 1.95      | 1.07  | 0.224(0.095) |
| 50                                | LASSO  | 1.98                              | 6.68  | 0.331(0.117) | 2.00      | 6.23  | 0.307(0.090) |
|                                   | SCAD   | 1.96                              | 6.04  | 0.311(0.210) | 1.99      | 5.80  | 0.262(0.125) |
|                                   | MCP    | 1.95                              | 5.74  | 0.387(0.297) | 1.98      | 5.19  | 0.306(0.173) |
|                                   | BAR    | 1.86                              | 1.80  | 0.286(0.143) | 1.88      | 1.78  | 0.265(0.122) |
| 100                               | LASSO  | 1.97                              | 14.20 | 0.442(0.218) | 1.98      | 11.67 | 0.330(0.127) |
|                                   | SCAD   | 1.83                              | 13.51 | 0.535(0.494) | 1.93      | 11.19 | 0.285(0.166) |
|                                   | MCP    | 1.79                              | 12.63 | 0.828(0.778) | 1.93      | 10.09 | 0.378(0.265) |
|                                   | BAR    | 1.70                              | 3.54  | 0.435(0.281) | 1.88      | 3.12  | 0.298(0.179) |

**Table S4.** Simulation results based on the bandwidth selection method (d).

| $p$                               | Method | $n = 300$                         |       |              | $n = 500$ |       |              |
|-----------------------------------|--------|-----------------------------------|-------|--------------|-----------|-------|--------------|
|                                   |        | $\beta = (0.5, 0.5, 0, \dots, 0)$ |       |              |           |       |              |
|                                   |        | TP                                | FP    | MMSE(SD)     | TP        | FP    | MMSE(SD)     |
| 10                                | LASSO  | 1.97                              | 1.39  | 0.185(0.072) | 2.00      | 1.60  | 0.153(0.061) |
|                                   | SCAD   | 1.88                              | 1.17  | 0.164(0.080) | 1.99      | 1.38  | 0.128(0.073) |
|                                   | MCP    | 1.86                              | 1.10  | 0.162(0.084) | 1.94      | 1.11  | 0.125(0.069) |
|                                   | BAR    | 1.89                              | 0.49  | 0.242(0.090) | 1.93      | 0.45  | 0.199(0.082) |
| 30                                | LASSO  | 1.93                              | 4.46  | 0.257(0.115) | 1.99      | 4.16  | 0.247(0.631) |
|                                   | SCAD   | 1.80                              | 4.08  | 0.274(0.192) | 1.97      | 3.65  | 0.264(1.094) |
|                                   | MCP    | 1.80                              | 3.89  | 0.322(0.254) | 1.96      | 3.37  | 0.286(1.148) |
|                                   | BAR    | 1.73                              | 1.57  | 0.321(0.396) | 1.95      | 1.08  | 0.303(0.856) |
| 50                                | LASSO  | 1.95                              | 7.17  | 0.255(0.097) | 1.99      | 6.94  | 0.228(0.086) |
|                                   | SCAD   | 1.87                              | 6.70  | 0.277(0.177) | 1.94      | 6.48  | 0.224(0.157) |
|                                   | MCP    | 1.83                              | 6.33  | 0.378(0.287) | 1.91      | 5.73  | 0.285(0.254) |
|                                   | BAR    | 1.82                              | 2.07  | 0.373(0.578) | 1.89      | 2.60  | 0.221(0.124) |
| 100                               | LASSO  | 1.92                              | 15.23 | 0.384(0.224) | 1.98      | 13.05 | 0.251(0.127) |
|                                   | SCAD   | 1.78                              | 14.48 | 0.556(0.692) | 1.89      | 12.07 | 0.263(0.288) |
|                                   | MCP    | 1.68                              | 13.66 | 0.952(1.070) | 1.86      | 10.49 | 0.354(0.463) |
|                                   | BAR    | 1.53                              | 4.30  | 0.454(0.346) | 1.81      | 4.27  | 0.272(0.138) |
| $\beta = (0.5, 0.7, 0, \dots, 0)$ |        |                                   |       |              |           |       |              |
| 10                                | LASSO  | 1.98                              | 1.41  | 0.277(0.086) | 2.00      | 1.49  | 0.233(0.078) |
|                                   | SCAD   | 1.94                              | 1.19  | 0.232(0.093) | 1.98      | 1.27  | 0.188(0.086) |
|                                   | MCP    | 1.94                              | 1.18  | 0.227(0.094) | 1.98      | 1.08  | 0.188(0.085) |
|                                   | BAR    | 1.89                              | 0.49  | 0.242(0.090) | 1.93      | 0.45  | 0.199(0.082) |
| 30                                | LASSO  | 1.93                              | 4.61  | 0.342(0.145) | 2.00      | 4.10  | 0.323(0.580) |
|                                   | SCAD   | 1.86                              | 4.30  | 0.339(0.219) | 1.99      | 3.62  | 0.324(1.024) |
|                                   | MCP    | 1.84                              | 4.11  | 0.407(0.299) | 1.99      | 3.20  | 0.342(1.071) |
|                                   | BAR    | 1.73                              | 1.57  | 0.321(0.396) | 1.95      | 1.08  | 0.303(0.856) |
| 50                                | LASSO  | 1.98                              | 7.21  | 0.358(0.123) | 2.00      | 6.73  | 0.333(0.229) |
|                                   | SCAD   | 1.91                              | 6.61  | 0.429(0.808) | 1.98      | 6.35  | 0.340(0.614) |
|                                   | MCP    | 1.92                              | 6.38  | 0.526(0.913) | 1.99      | 3.20  | 0.342(1.071) |
|                                   | BAR    | 1.82                              | 2.07  | 0.373(0.578) | 1.88      | 2.06  | 0.315(0.388) |
| 100                               | LASSO  | 1.96                              | 15.21 | 0.498(0.334) | 1.99      | 12.18 | 0.327(0.118) |
|                                   | SCAD   | 1.83                              | 14.27 | 0.713(0.872) | 1.96      | 11.89 | 0.314(0.277) |
|                                   | MCP    | 1.80                              | 13.52 | 1.106(1.296) | 1.96      | 10.55 | 0.413(0.447) |
|                                   | BAR    | 1.60                              | 4.27  | 0.554(0.416) | 1.91      | 3.05  | 0.293(0.153) |
